# Supplementary material
Source: Springer Nature journal article supplement (https://www.springermedizin.de/resource/supplementary/12889_2012_4115_MOESM1_ESM.pdf/9491520)
Supplement: MOESM1 [file 9491520]

## Enrolments

Assessed for eligibility (n = )

Excluded (n = )

- ◆ Not meeting inclusion criteria (n = )
- ◆ Declined to participate (n = )
- ◆ Other reasons (n = )

Randomised (n = 750)

## Allocation

Allocated to WR intervention (n = 375)  
Received WR intervention (n = )  
Did not receive WR intervention (give reasons) (n = )

Allocated to control (n = 375)  
Received control intervention (n = )  
Did not receive control intervention (give reasons) (n = )

## Follow-Up

Lost to follow-up at 12m (give reasons) (n = )  
Discontinued WR intervention by 12m (give reasons) (n = )

Lost to follow-up by 12m (give reasons) (n = )

Lost to follow-up at 24m (give reasons) (n = )  
Discontinued WR intervention by 24m (give reasons) (n = )

Lost to follow-up by 24m (give reasons) (n = )

## Analysis

Analysed (n = 319)  
◆ Excluded from analysis (give reasons) (n = )

Analysed (n = 319)  
◆ Excluded from analysis (give reasons) (n = )
